# Supplementary material
Source: PubMed Central journal article supplement (PMC3078500)
Supplement: Supp_Data.pdf [file Supp_Data.pdf]

## Supplementary Data

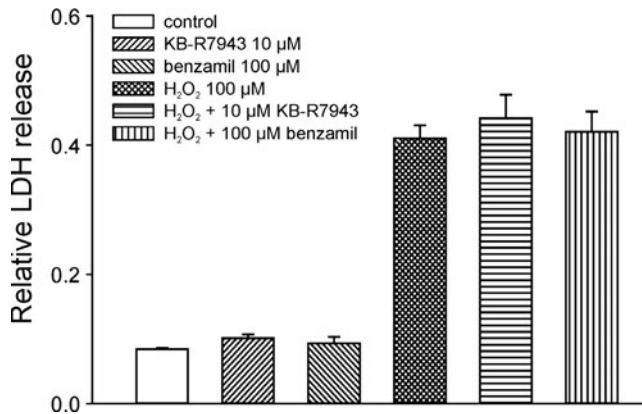

**SUPPLEMENTARY FIG. S1. Evidence that activation of Na<sup>+</sup>-Ca<sup>2+</sup> exchange system is not responsible for hydrogen peroxide (H<sub>2</sub>O<sub>2</sub>)-induced glutamate receptor-independent neuronal injury.** Summary data demonstrating the lack of protection against H<sub>2</sub>O<sub>2</sub>-induced glutamate receptor-independent neuronal injury by blockers of the Na<sup>+</sup>-Ca<sup>2+</sup> exchange system. Neurons were treated with 100  $\mu$ M H<sub>2</sub>O<sub>2</sub> in the absence or presence of 10  $\mu$ M 2-(2-(4-(4-nitrobenzyloxy)phenyl)ethyl)isothiourea (KB-R7943) or 100  $\mu$ M benzamil for 1 h in the presence of (5R,10S)-(+)-5-Methyl-10,11-dihydro-5H-dibenzo[a,d]cyclohepten-5,10-imine, 6-cyano-7-nitroquinoxaline-2,3-dione and nimodipine. Relative lactate dehydrogenase (LDH) release was measured 6 h after the H<sub>2</sub>O<sub>2</sub> exposure. One hour treatment with 100  $\mu$ M H<sub>2</sub>O<sub>2</sub> in the absence of KB-R7943 or benzamil induced 0.41  $\pm$  0.02 of relative LDH release ( $n$  = 4). In the presence of 10  $\mu$ M KB-R7943 or 100  $\mu$ M benzamil, relative LDH release by 100  $\mu$ M H<sub>2</sub>O<sub>2</sub> was 0.44  $\pm$  0.04 and 0.42  $\pm$  0.03, respectively.  $n$  = 4 wells in each group,  $p$  > 0.05 between H<sub>2</sub>O<sub>2</sub> alone and H<sub>2</sub>O<sub>2</sub> with KB-R7943 or benzamil.

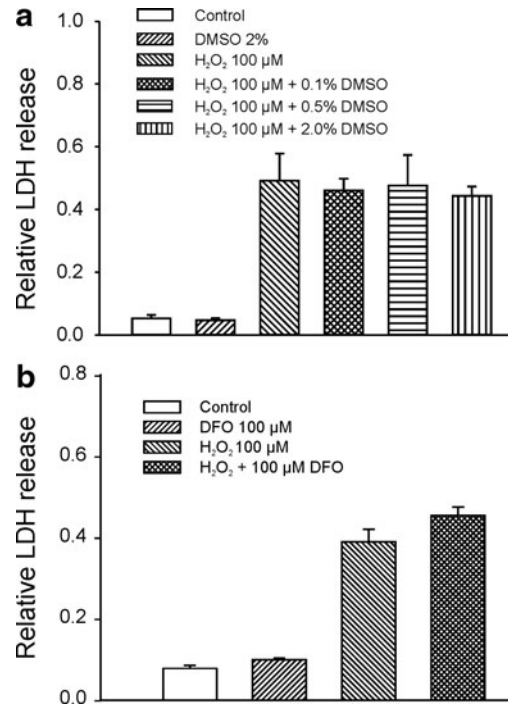

**SUPPLEMENTARY FIG. S2. Hydroxyl radicals are not responsible for H<sub>2</sub>O<sub>2</sub>-induced glutamate receptor-independent neuronal injury.** (a) Summary bar graph showing the lack of protection on H<sub>2</sub>O<sub>2</sub>-induced neuronal injury by hydroxyl radical scavenger dimethyl sulfoxide (DMSO). Various concentrations of DMSO were added into culture wells 10 min before and during 1 h incubation with 100  $\mu$ M H<sub>2</sub>O<sub>2</sub>. Relative LDH release was measured 6 h after exposure of neurons to H<sub>2</sub>O<sub>2</sub> in the absence or in the presence of DMSO. In the absence of DMSO, 1 h exposure to 100  $\mu$ M H<sub>2</sub>O<sub>2</sub> induced a relative LDH release of 0.49  $\pm$  0.09 ( $n$  = 4). In the presence of 0.1%, 0.5%, or 2% of DMSO, the relative LDH release was 0.46  $\pm$  0.04, 0.47  $\pm$  0.09, or 0.44  $\pm$  0.03, respectively ( $n$  = 4 wells in each group,  $p$  > 0.05 between control and different DMSO groups). Addition of 2% DMSO in the control medium did not affect the background LDH release. (b) Summary data showing the lack of protection on H<sub>2</sub>O<sub>2</sub>-induced neuronal injury by membrane permeable iron chelator deferoxamine (DFO). Neurons were incubated with the medium containing 100  $\mu$ M DFO 10 min before and during the exposure to 100  $\mu$ M H<sub>2</sub>O<sub>2</sub>. LDH release was measured 6 h after H<sub>2</sub>O<sub>2</sub> exposure. In the absence of DFO, 1 h exposure to H<sub>2</sub>O<sub>2</sub> induced a relative LDH release of 0.39  $\pm$  0.03 at 6 h. In the presence of 100  $\mu$ M DFO, the relative LDH release was 0.45  $\pm$  0.02 ( $n$  = 8 in each group,  $p$  > 0.05).
